# Supplementary material for: Bioengineering the Antimicrobial Activity of Yeast by Recombinant Thanatin Production
Source: MDPI journal article supplement (doi:10.3390/antibiotics12121719), 2023-12-12
Supplement: s1 [file s1]

# Supplementary information for “Bioengineering the Antimicro-bial Activity of Yeast by Recombinant Thanatin Production”

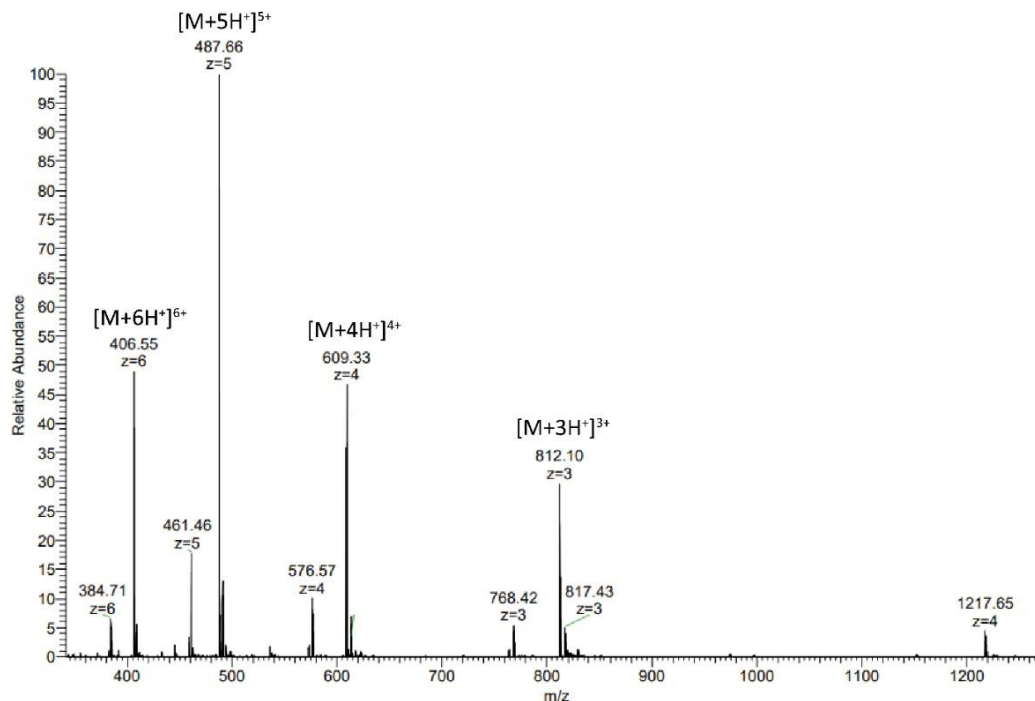

**Figure S1.** MS spectrum of rThan obtained by electrospray LC-MS.

**Table S1.** List of plasmids used in this study.

| Plasmid Name      | Plasmid Source |
|-------------------|----------------|
| pYTK002           | MoClo YTK [1]  |
| pPTK002           | MoClo PTK [2]  |
| pPTK006           | MoClo PTK [2]  |
| pPTK017           | MoClo PTK [2]  |
| pPTK019           | MoClo PTK [2]  |
| pYTK072           | MoClo YTK [1]  |
| pYTK095           | MoClo YTK [1]  |
| pLvL1_GAP_1       | This study     |
| pLvL1_GAP_MC<br>S | This study     |
| pPIC9K            | Invivogen      |
| pGAP4_MCS         | This study     |
| pGAP4_rThan       | This study     |

**Table S2.** List of oligonucleotides used in this study.

|     |                                                                               |
|-----|-------------------------------------------------------------------------------|
| P1  | TCAAGAGGATGTCAGAATGCC                                                         |
| P2  | TCTTTTCTCCAGAGATACCCCTTC                                                      |
| P3  | AGGGGTATCTCTGGAGAAAAGAGGAGACCGAGGATCCAGATCTCATATGCCT                          |
| P4  | GGCATTCTGACATCCTCTTGACTCATGAGACCCTTAAGGCATATGAGATCTGGATC<br>CTCG              |
| P5  | TGAGTTTGTAGCCTTAGACATGAC                                                      |
| P6  | GTTTATGCTTTTTCTGAAACCGCAAAGTTGG                                               |
| P7  | CCAACTTTGCGGTTTCAGAAAAAGCATAAAC                                               |
| P8  | CGGCCGCTCGGCGCTCTCCCTTATGCGACTC                                               |
| P9  | AAGGGAGAGCGCCGAGCGGCCGCGATTATCA                                               |
| P10 | CATGTCTAAGGCTACAACTCATGAGACCCTTAAGGCA                                         |
| P11 | AGGGGTATCTCTGGAGAAAAGAGGTTCCAAGAAGCCAGTTCCAATCATCTACTGCAACAGAC-<br>GTACCGGTAA |
| P12 | CATGTCTAAGGCTACAACTCACATTCTCTGGCACTTACCGGTACGTCTGTT                           |

## References

1. Lee, M.E.; DeLoache, W.C.; Cervantes, B.; Dueber, J.E. A Highly Characterized Yeast Toolkit for Modular, Multipart Assembly. *ACS Synth. Biol.* **2015**, *4*, 975–986. <https://doi.org/10.1021/sb500366v>.
2. Obst, U.; Lu, T.K.; Sieber, V. A Modular Toolkit for Generating *Pichia Pastoris* Secretion Libraries. *ACS Synth. Biol.* **2017**, *6*, 1016–1025. <https://doi.org/10.1021/acssynbio.6b00337>.
